# Supplementary material
Source: MDPI journal article supplement (https://www.mdpi.com/2311-7524/7/12/550)
Supplement: s1 [file s1]

## Supplementary material

**Table S1.** Orange fruit quality  $\pm$  standard error (SE) under the effect of six different treatments (control, topping, dichlorprop-p, triclopyr, topping + dichlorprop-p and topping + triclopyr) from the two experimental orchards with different rootstocks (CIVAC19 and Forner-Alcaide no. 517) and cultivars ('Lane Late' and 'Valencia Delta Seedless') from the 2020 harvest season.

| <b>Lane Late/CIVAC19</b> |                                   |                                    |                                      |                                      |                                                            |                                  |                               |
|--------------------------|-----------------------------------|------------------------------------|--------------------------------------|--------------------------------------|------------------------------------------------------------|----------------------------------|-------------------------------|
| <b>Treatment</b>         | <b>D <math>\pm</math> SE (mm)</b> | <b>PT <math>\pm</math> SE (mm)</b> | <b>Weigh (g) <math>\pm</math> SE</b> | <b>Juice (%) <math>\pm</math> SE</b> | <b>TSS (<math>^{\circ}</math>Brix) <math>\pm</math> SE</b> | <b>TA (g/100 cm<sup>3</sup>)</b> | <b>MI <math>\pm</math> SE</b> |
| Control                  | 87.32 $\pm$ 0.52 ns               | 5.98 $\pm$ 0.05 ns                 | 354.30 $\pm$ 12.91 a                 | 45.41 $\pm$ 0.23 ns                  | 11.22 $\pm$ 0.19 ns                                        | 0.71 $\pm$ 0.02 ns               | 15.81 $\pm$ 0.52 ns           |
| Topping                  | 84.68 $\pm$ 1.06 ns               | 6.06 $\pm$ 0.09 ns                 | 312.93 $\pm$ 4.87 b                  | 45.72 $\pm$ 0.22 ns                  | 11.17 $\pm$ 0.19 ns                                        | 0.91 $\pm$ 0.21 ns               | 13.49 $\pm$ 2.52 ns           |
| Dichlorprop-p            | 88.10 $\pm$ 1.28 ns               | 6.15 $\pm$ 0.54 ns                 | 375.25 $\pm$ 20.77 a                 | 47.16 $\pm$ 0.29 ns                  | 11.06 $\pm$ 0.53 ns                                        | 0.72 $\pm$ 0.03 ns               | 15.38 $\pm$ 0.32 ns           |
| Triclopyr                | 86.89 $\pm$ 1.43 ns               | 5.58 $\pm$ 0.57 ns                 | 350.03 $\pm$ 13.08 ab                | 46.46 $\pm$ 1.94 ns                  | 11.20 $\pm$ 0.40 ns                                        | 0.74 $\pm$ 0.03 ns               | 15.06 $\pm$ 0.44 ns           |
| Topping + Dichlorprop-p  | 87.92 $\pm$ 0.95 ns               | 5.67 $\pm$ 0.39 ns                 | 371.07 $\pm$ 9.95 a                  | 46.99 $\pm$ 0.13 ns                  | 15.99 $\pm$ 4.49 ns                                        | 0.72 $\pm$ 0.05 ns               | 23.03 $\pm$ 7.85 ns           |
| Topping + Triclopyr      | 85.46 $\pm$ 0.69 ns               | 5.89 $\pm$ 0.41 ns                 | 343.44 $\pm$ 7.70 ab                 | 45.39 $\pm$ 0.52 ns                  | 11.01 $\pm$ 0.31 ns                                        | 0.75 $\pm$ 0.05 ns               | 15.08 $\pm$ 0.61 ns           |
| <b>Valencia DS/FA517</b> |                                   |                                    |                                      |                                      |                                                            |                                  |                               |
| Control                  | 74.36 $\pm$ 1.34 ns               | 5.86 $\pm$ 0.11 ns                 | 218.44 $\pm$ 14.30 ns                | 49.63 $\pm$ 0.36 ns                  | 10.70 $\pm$ 0.41 ns                                        | 1.47 $\pm$ 0.03 ns               | 7.27 $\pm$ 0.15 c             |
| Topping                  | 74.12 $\pm$ 1.30 ns               | 5.75 $\pm$ 0.58 ns                 | 212.28 $\pm$ 5.67 ns                 | 50.32 $\pm$ 1.68 ns                  | 10.81 $\pm$ 0.03 ns                                        | 1.45 $\pm$ 0.06 ns               | 7.50 $\pm$ 0.29 bc            |
| Dichlorprop-p            | 77.25 $\pm$ 0.48 ns               | 5.67 $\pm$ 0.16 ns                 | 242.76 $\pm$ 9.89 ns                 | 50.66 $\pm$ 0.95 ns                  | 11.06 $\pm$ 0.21 ns                                        | 1.42 $\pm$ 0.03 ns               | 7.78 $\pm$ 0.31 abc           |
| Triclopyr                | 74.94 $\pm$ 0.94 ns               | 5.24 $\pm$ 0.31 ns                 | 221.52 $\pm$ 6.67 ns                 | 49.38 $\pm$ 0.48 ns                  | 11.16 $\pm$ 0.19 ns                                        | 1.47 $\pm$ 0.03 ns               | 7.60 $\pm$ 0.18 bc            |
| Topping + Dichlorprop-p  | 78.10 $\pm$ 1.44 ns               | 6.07 $\pm$ 0.27 ns                 | 248.95 $\pm$ 12.81 ns                | 49.10 $\pm$ 0.84 ns                  | 10.83 $\pm$ 0.20 ns                                        | 1.27 $\pm$ 0.02 ns               | 8.52 $\pm$ 0.26 a             |
| Topping + Triclopyr      | 76.50 $\pm$ 1.77 ns               | 5.56 $\pm$ 0.45 ns                 | 235.93 $\pm$ 13.29 ns                | 50.29 $\pm$ 1.73 ns                  | 10.87 $\pm$ 0.53 ns                                        | 1.33 $\pm$ 0.10 ns               | 8.19 $\pm$ 0.30 ab            |

Values with different letters are significantly different among the treatments according to LSD-Fisher test ( $p < 0.05$ ). ns: non-statistical differences. FA517: Forner-Alcaide no. 517 and Valencia DS: 'Valencia Delta Seedless'; D: Diameter; PT: Peel thickness; Weigh: Weigh of the fruit sample analyzed for fruit quality; TSS: Total Soluble Solids; TA: Titratable Acidity; MI: Maturity index.

**Table S2.** Shoot number  $\pm$  standard error (SE) under the effect of six different treatments (control, topping, dichlorprop-p, triclopyr, topping + dichlorprop-p and topping + triclopyr) in the two experimental orchards with different rootstocks (CIVAC19 and Forner-Alcaide no. 517) and cultivars ('Lane Late' and 'Valencia Delta Seedless').

| Treatment               | July, 2018                |                          | September, 2018        |                           | July, 2019              |                        | September, 2019           |                          |
|-------------------------|---------------------------|--------------------------|------------------------|---------------------------|-------------------------|------------------------|---------------------------|--------------------------|
|                         | Lane Late/CIVAC19         | Valencia DS/FA517        | Lane Late/CIVAC19      | Valencia DS/FA517         | Lane Late/CIVAC19       | Valencia DS/FA517      | Lane Late/CIVAC19         | Valencia DS/FA517        |
| Control                 | 4.33 $\pm$ 0.33 bcdef     | 3.50 $\pm$ 0.22 cdefghi  | 7.50 $\pm$ 0.76 a      | 5.50 $\pm$ 0.34 abcd      | 3.33 $\pm$ 0.71 defghi  | 6.29 $\pm$ 1.80 ab     | 1.60 $\pm$ 1.03 hijklm    | 0.33 $\pm$ 0.21 klm      |
| Topping                 | 5.00 $\pm$ 1.00 abcde     | 6.50 $\pm$ 0.72 ab       | 3.17 $\pm$ 1.25 defghi | 4.00 $\pm$ 1.03 bcdefg    | 7.00 $\pm$ 1.72 a       | 2.89 $\pm$ 0.75 efghij | 0.40 $\pm$ 0.24 jklm      | 0.00 $\pm$ 0.00 m        |
| Dichlorprop-p           | 1.83 $\pm$ 0.40 ghijklm   | 2.17 $\pm$ 0.60 fghijklm | 4.50 $\pm$ 1.26 bcdef  | 2.60 $\pm$ 0.60 efghijklm | 1.33 $\pm$ 0.53 ijklm   | 1.44 $\pm$ 0.80 hijklm | 0.20 $\pm$ 0.20 klm       | 2.17 $\pm$ 0.79 fghijklm |
| Triclopyr               | 3.00 $\pm$ 0.37 defghij   | 4.00 $\pm$ 0.68 bcdefg   | 5.00 $\pm$ 0.89 abcde  | 7.50 $\pm$ 1.15 a         | 2.00 $\pm$ 0.55 ghijklm | 1.67 $\pm$ 0.65 hijklm | 2.60 $\pm$ 1.03 efghijklm | 0.17 $\pm$ 0.17 lm       |
| Topping + dichlorprop-p | 2.83 $\pm$ 0.40 efghijk   | 6.00 $\pm$ 0.86 abc      | 5.67 $\pm$ 0.76 abc    | 2.83 $\pm$ 0.48 efghijk   | 4.44 $\pm$ 1.76 bcdef   | 1.67 $\pm$ 0.69 hijklm | 0.00 $\pm$ 0.00 m         | 0.33 $\pm$ 0.21 klm      |
| Topping + triclopyr     | 2.50 $\pm$ 0.62 efghijklm | 4.33 $\pm$ 0.67 bcdef    | 3.67 $\pm$ 0.49 cdefgh | 2.67 $\pm$ 0.33 efghijkl  | 3.89 $\pm$ 0.99 cdefg   | 1.56 $\pm$ 0.47 hijklm | 0.40 $\pm$ 0.24 jklm      | 0.33 $\pm$ 0.21 klm      |

Values with different letters are significantly different among treatments and between the orchards assayed according to LSD-Fisher test ( $p < 0.05$ ). Valencia DS: 'Valencia Delta Seedless'; FA517: Forner-Alcaide no. 517.
